# Supplementary material for: High Vaccenic Acid Content in Beef Fat Attenuates High Fat and High Carbohydrate Western Diet Induced Changes in Lipid Metabolism and Gut Microbiota in Pigs
Source: MDPI journal article supplement (doi:10.3390/microorganisms9122517), 2021-12-06
Supplement: s1 [file s1]

## Supplementary Materials

**Table S1.** Equations for the (Appearance 0-30 min) and clearance (30-120 min) phases of the postprandial glucose insulin and triglyceride curves. \* denotes significance compared to LBW-CD, \*\* denotes significance compared to IR-HFHC-LVA

| Groups      | Glucose               |                        | Insulin               |                        | Triglyceride            |                        |
|-------------|-----------------------|------------------------|-----------------------|------------------------|-------------------------|------------------------|
|             | Appearance (0-30 min) | Clearance (30-120 min) | Appearance (0-30 min) | Clearance (30-120 min) | Appearance (0-30 min)   | Clearance (30-120 min) |
| Control-CD  | $0.174x + 5.60$       | $-0.0484x + 10.80$     | $0.551x + 2.08$       | $-0.166x + 19.30$      | $0.0439x + 3.39$        | $0.0022x + 7.89$       |
| LBW-CD      | $0.136x + 5.35$       | $-0.043x + 9.59$       | $0.605x + 2.13$       | $-0.182x + 20.60$      | $0.0665x + 4.43$        | $0.00442x + 12.50$     |
| IR-HFHC-LVA | $0.257x + 4.96^*$     | $-0.0729x + 15.30$     | $1.06x + 1.80^*$      | $-0.354x + 44.70^*$    | $0.0756x + 12.40$       | $-0.0555x + 26.50^*$   |
| IR-HFHC-HVA | $0.198x + 4.78$       | $-0.0668x + 13.30$     | $0.58x + 18^{**}$     | $-0.199x + 25.40^{**}$ | $-0.0168x + 11.50^{**}$ | $0.00459x + 8.43^{**}$ |

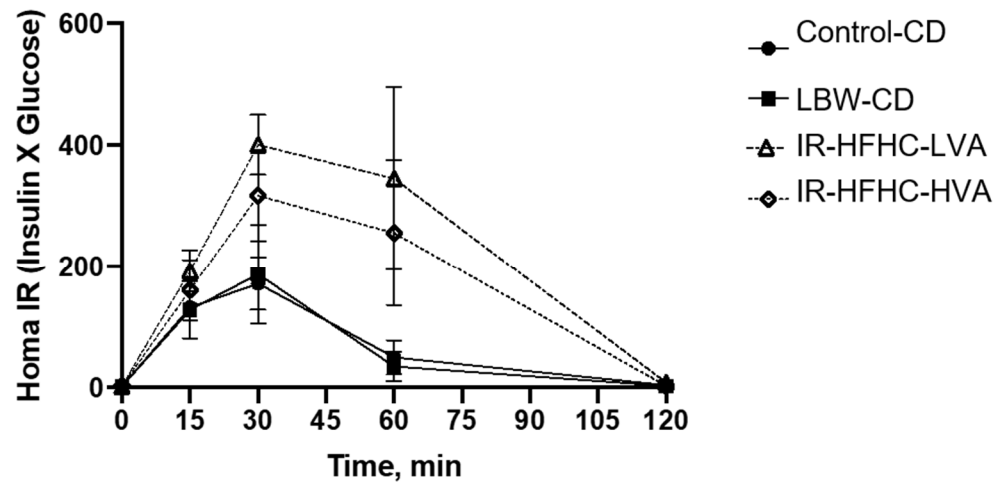

**Figure S1.** Homeostatic Model of Assessment of Insulin Resistance (HOMA IR). Assessed by product of postprandial blood glucose and plasma insulin concentration for determination of insulin resistance.

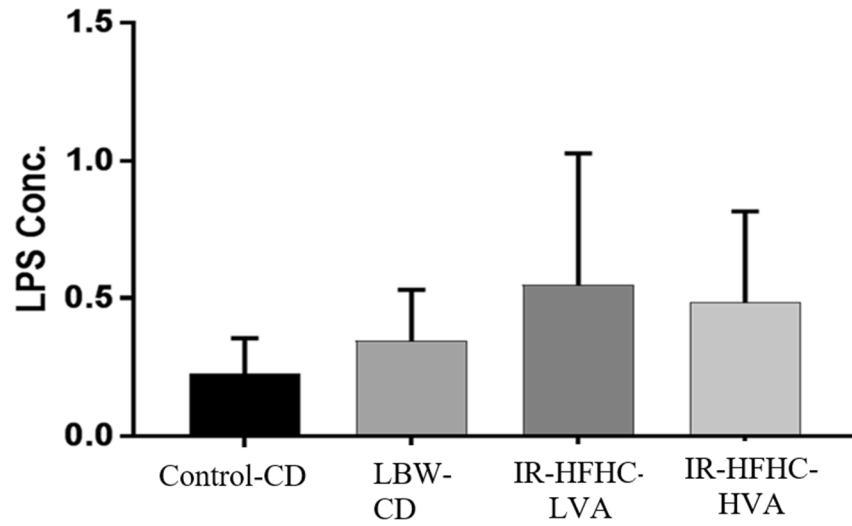

**Figure S2.** Concentration of serum lipopolysaccharide (LPS) in control and LBW pigs on control diet, HFHC-LVA or HFHC-HVA diet. HFHC-HVA did not affect LPS in IR swine. Values are means  $\pm$  SD. CD, control diet; IR, Insulin resistant; HFHC, high-fat, high-carbohydrate diet; HFHC-HVA, high-fat, high-carbohydrate diet enriched with vaccenic acid, ( $p = 0.852$ ).
